# Supplementary material
Source: PubMed Central journal article supplement (PMC4988201)
Supplement: AEM.00835-16_zam999117353so1.pdf [file AEM.00835-16_zam999117353so1.pdf]

Table S1: Predicted ORF characteristics of phage 9871, showing closest match using the NCBI BLAST database, percentage amino acid identity and percentage query coverage.

| ORF | Start | End   | Strand | Size (aa) | Putative function           | Best match (% aa identity/% query coverage)                                                         | e value |
|-----|-------|-------|--------|-----------|-----------------------------|-----------------------------------------------------------------------------------------------------|---------|
| 1   | 64    | 174   | +      | 37        | TerS, partial               | gp172, partial, <i>Streptococcus</i> phage Sfi11 (100/62)                                           | 3e-06   |
| 2   | 179   | 592   | +      | 137       | Hypothetical protein        | Hypothetical protein, <i>Lactococcus lactis</i> (92/100)                                            | 9e-83   |
| 3   | 585   | 1973  | +      | 462       | TerL                        | Putative terminase large subunit, <i>Lactococcus</i> phage ul36 (98/100)                            | 0.0     |
| 4   | 1974  | 3314  | +      | 446       | Portal                      | Portal protein, <i>Lactococcus lactis</i> (95/99)                                                   | 0.0     |
| 5   | 3318  | 4358  | +      | 346       | Minor capsid protein        | Hypothetical protein Tuc2009_32, <i>Lactococcus</i> phage Tuc2009 (95/99)                           | 0.0     |
| 6   | 4475  | 5074  | +      | 199       | Scaffolding protein         | Scaffolding protein, <i>Lactococcus lactis</i> (93/99)                                              | 6e-113  |
| 7   | 5090  | 5953  | +      | 287       | Major capsid protein        | Capsid protein, <i>Lactococcus lactis</i> (94/100)                                                  | 0.0     |
| 8   | 6019  | 6210  | +      | 63        | Hypothetical protein        | Hypothetical protein, <i>Lactococcus lactis</i> (97/100)                                            | 6e-32   |
| 9   | 6224  | 6556  | +      | 110       | Head-tail connector protein | Hypothetical protein, <i>Lactococcus lactis</i> (99/100)                                            | 2e-69   |
| 10  | 6553  | 6864  | +      | 103       | Hypothetical protein        | Hypothetical protein, <i>Lactococcus garvieae</i> (97/100)                                          | 5e-68   |
| 11  | 6861  | 7187  | +      | 108       | Hypothetical protein        | Hypothetical protein Tuc2009_41, <i>Lactococcus</i> phage Tuc2009 (97/100)                          | 3e-71   |
| 12  | 7184  | 7573  | +      | 129       | Tail terminator protein     | Major structural protein 2, <i>Lactococcus</i> phage Tuc2009 (95/100)                               | 1e-86   |
| 13  | 7584  | 8081  | +      | 165       | Major tail protein          | Hypothetical protein, <i>Lactococcus lactis</i> (98/100)                                            | 8e-112  |
| 14  | 8197  | 8547  | +      | 116       | Tail chaperone protein      | Hypothetical protein, <i>Lactococcus lactis</i> (97/100)                                            | 1e-71   |
| 15  | 8631  | 8900  | +      | 89        | Hypothetical protein        | Hypothetical protein, <i>Lactococcus lactis</i> (100/100)                                           | 5e-56   |
| 16  | 8916  | 11666 | +      | 916       | Tape measure protein        | Tail protein <i>Lactococcus garvieae</i> (82/99)                                                    | 0.0     |
| 17  | 11676 | 12437 | +      | 253       | Putative distal tail        | Hypothetical protein LLT6_11080 <i>Lactococcus lactis</i> subsp. <i>cremoris</i> TIFN6 (95/100)     | 2e-177  |
| 18  | 12437 | 15169 | +      | 910       | Tail-associated lysin       | Peptidase M23, <i>Lactococcus lactis</i> (72/100)                                                   | 0.0     |
| 19  | 15181 | 17124 | +      | 647       | Antireceptor                | Hypothetical protein P620_05350, <i>Lactococcus lactis</i> subsp. <i>lactis</i> KLDS 4.0325 (88/41) | 1e-172  |
| 20  | 17200 | 17727 | +      | 175       | Serine acetyltransferase    | Serine acetyltransferase, <i>Clostridium</i> sp. SS2/1 (55/98)                                      | 4e-58   |
| 21  | 17861 | 18085 | +      | 74        | Holin                       | Holin, <i>Lactococcus lactis</i> (99/100)                                                           | 8e-43   |
| 22  | 18112 | 18357 | +      | 81        | Holin                       | orf27, <i>Streptococcus</i> phage 858 (89/100)                                                      | 2e-41   |
| 23  | 18359 | 18961 | +      | 200       | Lysin                       | ORF44, <i>Streptococcus</i> phage 7201 (91/99)                                                      | 2e-130  |
| 24  | 19168 | 19353 | +      | 61        | Endonuclease                | Hypothetical protein DT1p24, <i>Streptococcus</i> phage DT1 (97/100)                                | 2e-32   |

|    |       |       |   |     |                                     |                                                                                                |        |
|----|-------|-------|---|-----|-------------------------------------|------------------------------------------------------------------------------------------------|--------|
| 25 | 19420 | 19647 | + | 75  | Lysin                               | Lysin, <i>Streptococcus</i> phage ALQ13.2 (88/100)                                             | 5e-34  |
| 26 | 19713 | 19850 | + | 45  | Hypothetical protein                | (None)                                                                                         | N/A    |
| 27 | 20215 | 20418 | + | 67  | Cro-like protein                    | Putative cro homolog, <i>Streptococcus</i> phage TP-J34 (84/100)                               | 6e-34  |
| 28 | 20459 | 21403 | + | 314 | Hypothetical protein                | Hypothetical protein X841_03540, <i>Streptococcus thermophilus</i> M17PTZA496 (97/100)         | 0.0    |
| 29 | 21396 | 21935 | + | 179 | Hypothetical protein                | Hypothetical protein, <i>Streptococcus</i> phage 20617 (94/98)                                 | 5e-114 |
| 30 | 22058 | 22267 | + | 69  | Cro-like repressor                  | Putative cro repressor, <i>Streptococcus</i> phage 5093 (100/100)                              | 4e-41  |
| 31 | 22284 | 22406 | + | 40  | Hypothetical protein                | gp40, <i>Streptococcus</i> phage Sfi11 (100/100)                                               | 1e-18  |
| 32 | 22657 | 23526 | + | 289 | Primosome component                 | Putative primosome component, <i>Streptococcus</i> phage TP-J34 (95/100)                       | 0.0    |
| 33 | 23538 | 24320 | + | 260 | DNA replication protein             | Helicase, <i>Streptococcus</i> phage 20617 (96/100)                                            | 0.0    |
| 34 | 24317 | 24511 | + | 64  | Hypothetical protein                | ORF6a, <i>Streptococcus</i> phage 7201 (97/90)                                                 | 3e-32  |
| 35 | 24636 | 25463 | + | 275 | RecT recombinase                    | Hypothetical protein, <i>Lactococcus garvieae</i> (61/93)                                      | 6e-107 |
| 36 | 25456 | 26292 | + | 278 | Nuclease                            | Nuclease, <i>Streptococcus suis</i> (62/97)                                                    | 2e-124 |
| 37 | 26332 | 26976 | + | 214 | Hypothetical protein                | Hypothetical protein, <i>Streptococcus suis</i> (71/98)                                        | 3e-104 |
| 38 | 26991 | 27437 | + | 148 | Single-stranded DNA-binding protein | ORF9, <i>Streptococcus</i> phage 7201 (91/100)                                                 | 7e-92  |
| 39 | 27452 | 28006 | + | 184 | HNH endonuclease                    | Hypothetical protein, <i>Lactobacillus brevis</i> (48/97)                                      | 6e-51  |
| 40 | 28003 | 28464 | + | 153 | Endodeoxyribonuclease<br>RusA       | Hypothetical protein, <i>Streptococcus</i> phage Abc2 (94/100)                                 | 4e-101 |
| 41 | 28525 | 28695 | + | 56  | Hypothetical protein                | Hypothetical protein SPV2972_gp40, <i>Streptococcus</i> phage 2972 (95/100)                    | 1e-28  |
| 42 | 28686 | 28859 | + | 57  | Hypothetical protein                | Hypothetical protein Sfi19p39, <i>Streptococcus</i> phage Sfi19 (95/100)                       | 1e-29  |
| 43 | 28856 | 29011 | + | 51  | Hypothetical protein                | Hypothetical protein SPV2972_gp41 <i>Streptococcus</i> phage 2972 (90/100)                     | 5e-23  |
| 44 | 29144 | 29632 | + | 162 | Hypothetical protein                | Hypothetical protein X841_03635, <i>Streptococcus thermophilus</i> M17PTZA496 (78/100)         | 7e-84  |
| 45 | 29633 | 30145 | + | 170 | DNA binding protein                 | DNA binding protein, <i>Streptococcus</i> phage 2972 (95/100)                                  | 3e-113 |
| 46 | 30148 | 30960 | + | 270 | DNA methyltransferase               | DNA methyltransferase, <i>Streptococcus agalactiae</i> (73/92)                                 | 3e-130 |
| 47 | 30893 | 31183 | + | 96  | Hypothetical protein                | Hypothetical protein, <i>Streptococcus</i> phage ALQ13.2 (84/96)                               | 3e-50  |
| 48 | 31187 | 31894 | + | 235 | Hypothetical protein                | ORF18, <i>Streptococcus</i> phage 7201 (91/100)                                                | 7e-156 |
| 49 | 31960 | 32121 | - | 53  | Hypothetical protein                | CDP-diacylglycerol--serine O-phosphatidyltransferase, <i>Sulfurovum lithotrophicum</i> (41/67) | 8.4    |
